# Supplementary material for: Ester Bonds for Modulation of the Mechanical Properties of Protein Hydrogels
Source: MDPI journal article supplement (doi:10.3390/ijms241310778), 2023-06-28
Supplement: s1 [file s1]

# **Supplementary Information**

## **Ester Bonds for Modulation of the Mechanical Properties of Protein Hydrogels**

**Di Zhang, Luofei Li, Yizhou Fang, Quan Ma, Yi Cao \* and Hai Lei \***

Collaborative Innovation Center of Advanced Microstructures, National  
Laboratory of Solid State  
Microstructure, Department of Physics, Nanjing University, 22 Hankou Road,  
Nanjing 210093, China; njuzdi@163.com (D.Z.); luffy19980620@gmail.com (L.L.);  
chex408fyz@163.com (Y.F.);  
maquan@smail.nju.edu.cn (Q.M.)  
\* Correspondence: caoyi@nju.edu.cn (Y.C.); leihai@nju.edu.cn (H.L.)

### Fgβ-(GB1-ParV)<sub>2</sub>-cys:

MKLGSNEEGFFSARGHRPLDGS GSGSGSAGTGSGRSMDTYKLI L NGKTLK  
GETTTEAVDAATAAEKVFKQYANDNGVDGEW TYDDATKTFTVTERS **GEIKT**  
**TVMAGGKTSTENEVATLKAKDIEGGVEVSDKIT YKGLYPNEKYDVIGKIY**  
**EVKDGELVNP GHPVSVVNSGDDLKADTTGKGWTLNFGKLNLEAGKSYVV**  
**FETVVS MENVIDTDGDGKPKKKQELTHEDPNDKSQTFRIR**SMDTYKLI L N  
GKTLKGETTTEAVDAATAAEKVFKQYANDNGVDGEW TYDDATKTFTVTERS  
**GEIKT****TVMAGGKTSTENEVATLKAKDIEGGVEVSDKIT YKGLYPNEKYDV**  
**IGKIYEVKDGELVNP GHPVSVVNSGDDLKADTTGKGWTLNFGKLNLEAG**  
**KSYVVFETVVS MENVIDTDGDGKPKKKQELTHEDPNDKSQTFRIR**SCGTE  
FAAALEHHHHHH

### SdrG-cys:

MKLGSEQGSNVNHLIKVTDQSIT EGYDDSDGI IKAHDAENLIYDVTFEVDD  
KVKSGDTMTVNIDKNTVPSDLTDSFAIPKIKDNSGEI IATGTYDNTNKQIT  
YTFTDYVDKYENIKAHLKLTSYIDKSKVPNNNTKLDVEYKTALSSVNKTIT  
VEYQKPNENRTANLQSMFTNIDTKNHTVEQTIYINPLRYSAKETNVNISGN  
GDEGSTIIDDSTI IKVYKVGDNQNLPSNRIYDYSEYEDVTNDDYAQLGNN  
NDVNINFGNIDSPYI IKVISKYDPNKDDYTTIQQTVMQTTINEYTGERT  
ASYDNTIAFSTSSGQGQGDLPPEKTRS CGTEFAAALEHHHHHH

### cys-ParV<sub>2</sub>-cys:

MRGSHHHHHH **CGSGEIKT****TVMAGGKTSTENEVATLKAKDIEGGVEVSDKIT**  
**YKGLYPNEKYDVIGKIYEVKDGELVNP GHPVSVVNSGDDLKADTTGKGWTL**  
**NFGKLNLEAGKSYVVFETVVS MENVIDTDGDGKPKKKQELTHEDPNDKSQT**  
**FRIRSGEIKT****TVMAGGKTSTENEVATLKAKDIEGGVEVSDKIT YKGLYPN**  
**EKYDVIGKIYEVKDGELVNP GHPVSVVNSGDDLKADTTGKGWTLNFGKLN**  
**LEAGKSYVVFETVVS MENVIDTDGDGKPKKKQELTHEDPNDKSQTFRIR**SG  
TC

### cys-GB1<sub>2</sub>-cys:

MRGSHHHHHH **CGSMDTYKLI L NGKTLKGETTTEAVDAATAAEKVFKQYANDN**  
**GVDGEW TYDDATKTFTVTEGPQGIWGQMDTYKLI L NGKTLKGETTTEAVDA**  
**ATAAEKVFKQYANDNGVDGEW TYDDATKTFTVTERS**GTCT

**Figure S1.** Sequences for proteins Fgβ-(GB1-ParV)<sub>2</sub>-cys, SdrG-cys, cys-ParV<sub>2</sub>-cys and cys-GB1<sub>2</sub>-cys. The sequence of ParV is shown in green and the ester bond within ParV is formed between T and Q residues.

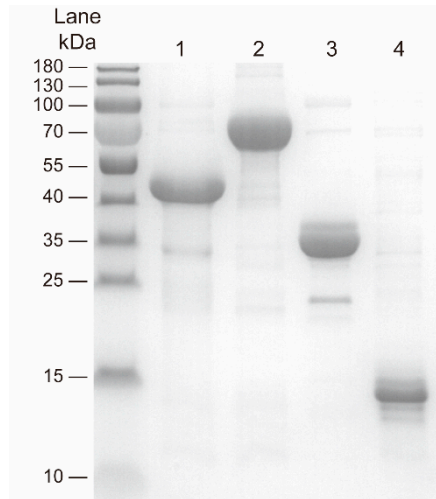

**Figure S2.** Proteins characterization by SDS-PAGE. Lanes 1-4 are SdrG-cys, Fg $\beta$ -(GB1-ParV)<sub>2</sub>-cys, cys-ParV<sub>2</sub>-cys, cys-GB1<sub>2</sub>-cys, respectively.

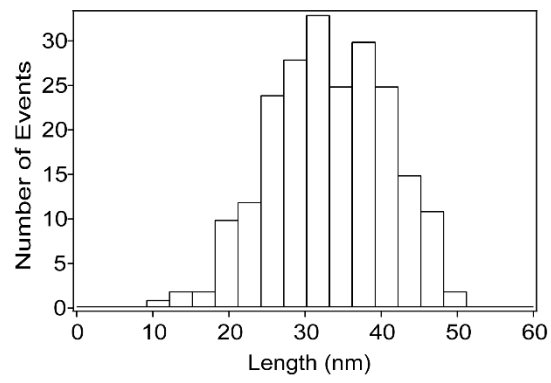

**Figure S3.** The histogram of the contour length before GB1 unfolding in Tris buffer at pH 7.4.

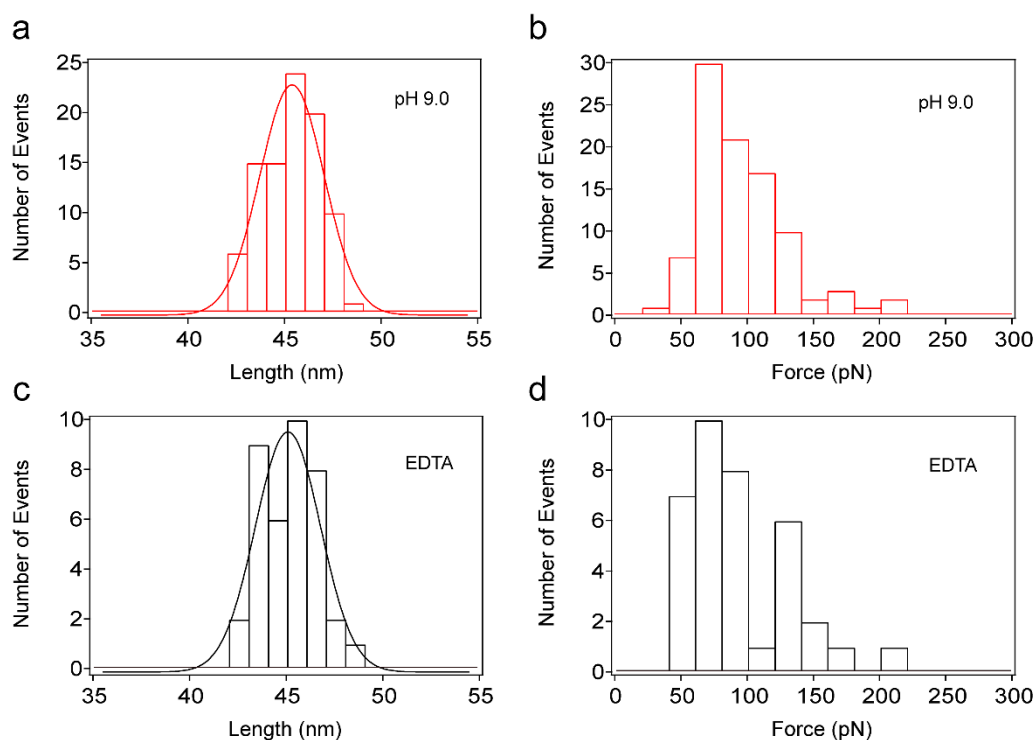

**Figure S4.** (a) Histogram of contour length increments ( $45.8 \pm 2.32$  nm) for the ester bond rupture events peaks at pH 9.0; (b) rupture force histogram of ester bond at pH 9.0; (c) histogram of contour length increments ( $45.4 \pm 2.38$  nm) for the ester bond rupture events peaks in Tris buffer with EDTA. (d) rupture force histogram of ester bond in Tris buffer with EDTA.

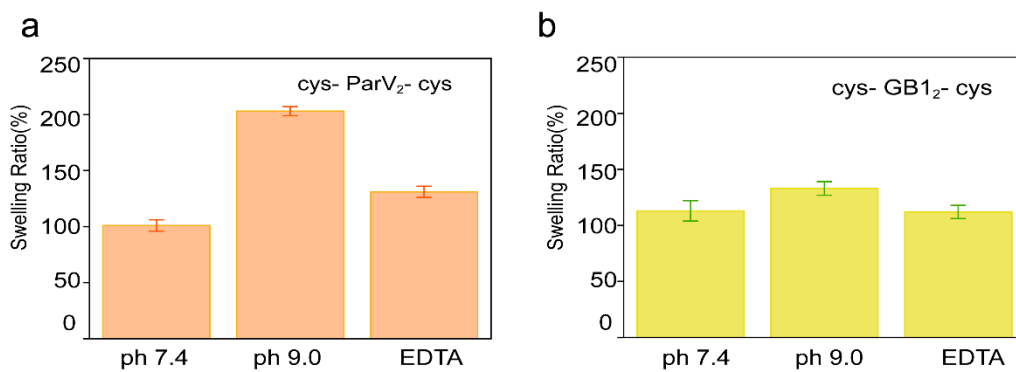

**Figure S5. (a)** Swelling measurement of cys-ParV<sub>2</sub>-cys hydrogels under different conditions. The swelling ratios of the hydrogels at pH 7.4, at pH 9.0 and with 10 mM EDTA are as follows: 101% ± 5%, 203% ± 4% and 131% ± 5%, respectively; **(b)** Swelling measurement of cys-GB1<sub>2</sub>-cys hydrogels under different conditions. The swelling ratios of the hydrogels at pH 7.4, at pH 9.0 and with 10 mM EDTA are as follows: 113% ± 9%, 133% ± 6% and 112% ± 6%, respectively. The hydrogels were taken out and weighed immediately after being removed from the mold, and the weight was recorded as  $W_0$ . After swelling sufficiently and being immersed in different solutions, the hydrogels were removed and weighed again, with the weight recorded as  $W_i$ . The swelling ratio was calculated using following formula: Swelling ratio (%) =  $[(W_i - W_0)/W_0] \times 100\%$ .

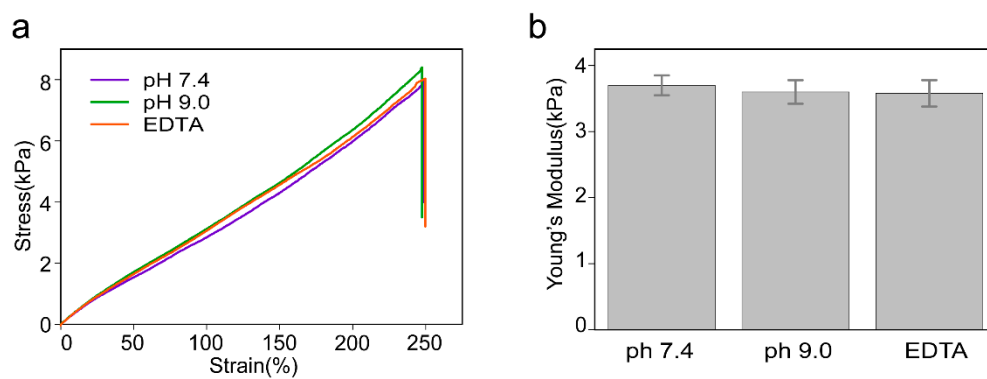

**Figure S6.** Tensile test experiments of cys-GB12-cys hydrogels. **(a)** Stress–strain curves for cys-GB12-cys hydrogels under different conditions; **(b)** Young's modulus of cys-GB12-cys hydrogels in three conditions.

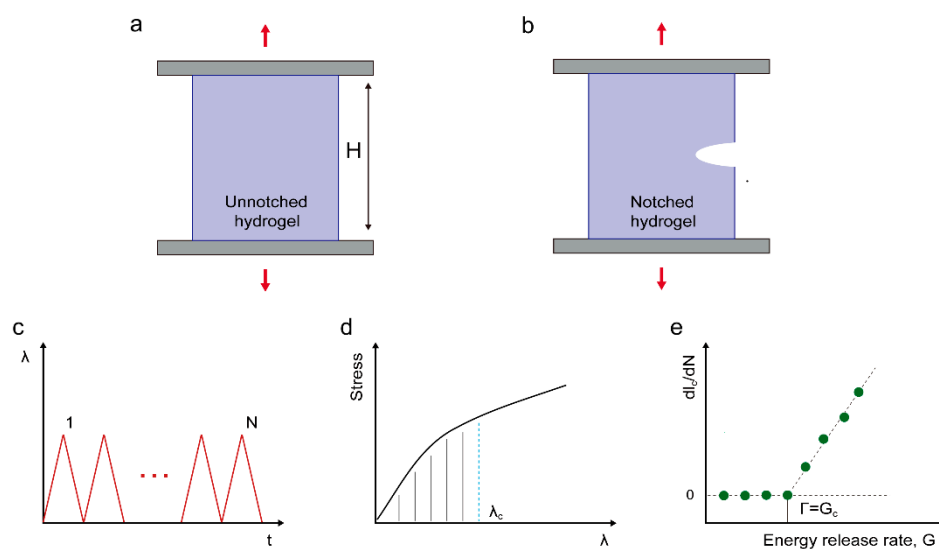

**Figure S7.** (a) Schematic of stretching unnotched hydrogel; (b) schematic of stretching notched hydrogel; (c) cyclic load/unload test; (d) stretch-strength curves; (e) illustration of measuring crack extension per cycle  $dl_c/dN$  versus energy release rate  $G$  curves.
